# Supplementary material for: Down-regulation of sfrp1 in a mammary epithelial cell line promotes the development of a cd44high/cd24low population which is invasive and resistant to anoikis
Source: PubMed Central journal article supplement (PMC2687411; doi:10.1186/1475-2867-9-11), 2009-05-07
Supplement: 1475-2867-9-11-S1.pdf [file 1475-2867-9-11-S1.pdf]

**Table1.** List of 130 genes with validated differential expression between TERT-pSUPER and TERT-siSFRP1 cells\*.

| Probe ID                          | Gene Symbol | Gene Name                                                                               | Score (d) | Fold Change | SD    | Probe ID                                  | Gene Symbol | Gene Name                                                                  | Score (d) | Fold Change | SD    |
|-----------------------------------|-------------|-----------------------------------------------------------------------------------------|-----------|-------------|-------|-------------------------------------------|-------------|----------------------------------------------------------------------------|-----------|-------------|-------|
| <i>positively regulated genes</i> |             |                                                                                         |           |             |       | <i>positively regulated genes (cont.)</i> |             |                                                                            |           |             |       |
| A_23_P66011                       | NECAB2      | EF hand calcium binding protein 2                                                       | 2.859     | 3.588       | 1.555 | A_24_P918907                              |             |                                                                            | 1.394     | 1.502       | 0.387 |
| A_23_P155796                      | GNRHR       | gonadotropin-releasing hormone receptor                                                 | 2.832     | 2.411       | 0.213 | A_23_P93169                               | GLULD1      | glutamate-ammonia ligase (glutamine synthetase) domain containing 1        | 1.387     | 1.848       | 0.784 |
| A_24_P160225                      | CXorf36     | chromosome X open reading frame 36                                                      | 2.731     | 2.420       | 0.278 | A_23_P104445                              | PIK3AP1     | phosphoinositide-3-kinase adaptor protein 1                                | 1.379     | 1.396       | 0.311 |
| A_32_P60013                       | C21orf135   | chromosome 21 open reading frame 135                                                    | 2.660     | 3.511       | 2.497 | A_32_P6841                                |             |                                                                            | 1.368     | 1.542       | 0.152 |
| A_23_P416011                      | SPAG11B     | sperm associated antigen 11B                                                            | 2.617     | 3.041       | 0.962 | A_24_P932736                              |             |                                                                            | 1.359     | 1.701       | 0.631 |
| A_32_P23113                       | FLNB        | filamin B, beta (actin binding protein 278)                                             | 2.365     | 2.732       | 0.845 | A_23_P210419                              | DLGAP4      | discs, large (Drosophila) homolog-associated protein 4                     | 1.353     | 1.552       | 0.188 |
| A_24_P817490                      |             |                                                                                         | 2.311     | 2.273       | 0.424 | A_24_P223163                              | NAF1        | nuclear assembly factor 1 homolog (S. cerevisiae)                          | 1.350     | 1.628       | 0.309 |
| A_24_P934592                      |             |                                                                                         | 2.270     | 3.432       | 2.375 | A_23_P309545                              | MDM2        | Mdm2 p53 binding protein homolog (mouse)                                   | 1.345     | 1.485       | 0.080 |
| A_23_P424126                      | ZNF354C     | zinc finger protein 354C                                                                | 2.204     | 2.142       | 0.337 | A_24_P942036                              |             |                                                                            | 1.338     | 1.362       | 0.283 |
| A_24_P331998                      | DOCK8       | dedicator of cytokinesis 8                                                              | 2.145     | 2.457       | 0.757 | A_32_P31827                               |             |                                                                            | 1.337     | 1.594       | 0.262 |
| A_23_P47616                       | FOLH1       | folate hydrolase (prostate-specific membrane antigen) 1                                 | 2.116     | 2.231       | 0.514 | A_23_P32078                               | SLC28A3     | solute carrier family 28 (sodium-coupled nucleoside transporter), member 3 | 1.322     | 1.561       | 0.230 |
| A_23_P78840                       | KIR2DS4     | Killer cell immunoglobulin-like receptor, two domains, short cytoplasmic tail, 4        | 2.101     | 2.037       | 0.286 | A_32_P752261                              |             |                                                                            | 1.320     | 1.529       | 0.483 |
| A_24_P932875                      | UNQ6490     | similar to YPLR6490                                                                     | 2.077     | 2.039       | 0.305 | A_32_P26738                               | KIAA1143    | KIAA1143                                                                   | 1.283     | 1.575       | 0.256 |
| A_24_P185368                      | ZSCAN4      | zinc finger and SCAN domain containing 4                                                | 2.049     | 1.934       | 0.221 | A_23_P254061                              | LUZPP1      | leucine zipper protein pseudogene 1                                        | 1.275     | 1.524       | 0.190 |
| A_24_P24053                       |             |                                                                                         | 2.019     | 2.134       | 0.473 | A_24_P269895                              | HNRNPA3     | heterogeneous nuclear ribonucleoprotein A3                                 | 1.273     | 1.478       | 0.118 |
| A_23_P35309                       | TAF5L       | TAF5-like RNA polymerase II, p300/CBP-associated factor (PCAF)-associated factor, 65kDa | 1.999     | 2.238       | 0.677 | A_23_P153286                              | ZNF234      | zinc finger protein 234                                                    | 1.272     | 1.520       | 0.182 |
| A_32_P70045                       |             |                                                                                         | 1.991     | 1.999       | 0.298 | A_24_P796274                              |             |                                                                            | 1.271     | 1.616       | 0.341 |
| A_32_P93894                       |             |                                                                                         | 1.966     | 1.957       | 0.308 | A_24_P290927                              | UBAP2L      | ubiquitin associated protein 2-like                                        | 1.260     | 1.748       | 0.742 |
| A_23_P214935                      | VNN3        | vanin 3                                                                                 | 1.963     | 2.066       | 0.434 | A_32_P82189                               | FAM161A     | family with sequence similarity 161, member A                              | 1.260     | 1.565       | 0.263 |
| A_23_P208706                      | BAX         | BCL2-associated X protein                                                               | 1.924     | 1.889       | 0.243 | A_24_P754185                              |             |                                                                            | 1.248     | 1.664       | 0.488 |
| A_24_P942492                      | PALM2       | paralemnin 2                                                                            | 1.923     | 1.931       | 0.297 | A_23_P200772                              | ZNF644      | zinc finger protein 644                                                    | 1.247     | 1.561       | 0.279 |
| A_23_P217570                      | CAPN6       | calpain 6                                                                               | 1.865     | 1.895       | 0.307 | A_23_P203150                              | TMPPRS513   | transmembrane protease, serine 13                                          | 1.247     | 1.571       | 0.318 |
| A_24_P76512                       |             |                                                                                         | 1.854     | 1.853       | 0.230 | A_32_P111394                              |             |                                                                            | 1.241     | 1.651       | 0.455 |
| A_32_P74771                       |             |                                                                                         | 1.843     | 2.111       | 0.553 | A_23_P2258                                | CCDC62      | coiled-coil domain containing 62                                           | 1.239     | 1.603       | 0.400 |
| A_32_P161667                      |             |                                                                                         | 1.819     | 2.036       | 0.497 | A_23_P12329                               | APH1A       | anterior pharynx defective 1 homolog A (C. elegans)                        | 1.239     | 1.444       | 0.084 |
| A_24_P105891                      | DZIP1L      | DAZ interacting protein 1-like                                                          | 1.800     | 2.033       | 0.497 | A_32_P85676                               | STK32B      | serine/threonine kinase 32B                                                | 1.227     | 1.821       | 0.628 |
| A_23_P34452                       | LOR         | loricrin                                                                                | 1.795     | 1.711       | 0.105 | A_24_P65597                               | RPS19       | ribosomal protein S19                                                      | 1.224     | 2.577       | 3.148 |
| A_24_P925901                      |             |                                                                                         | 1.793     | 1.960       | 0.452 | A_32_P481631                              |             |                                                                            | 1.224     | 1.476       | 0.153 |
| A_23_P346311                      | BAX         | BCL2-associated X protein                                                               | 1.784     | 1.808       | 0.234 | A_24_P325992                              | LIFR        | leukemia inhibitory factor receptor alpha                                  | 1.222     | 1.590       | 0.348 |
| A_24_P281403                      |             |                                                                                         | 1.782     | 1.695       | 0.094 | A_23_P114185                              | TSPAN7      | tetraspanin 7                                                              | 1.221     | 1.551       | 0.298 |
| A_24_P933965                      |             |                                                                                         | 1.778     | 1.686       | 0.603 | A_24_P315306                              | ITPR1L2     | inositol 1,4,5-triphosphate receptor interacting protein-like 2            | 1.213     | 1.424       | 0.069 |
| A_32_P131143                      | CECR4       | cat eye syndrome chromosome region, candidate 4                                         | 1.773     | 1.898       | 0.391 | A_24_P918575                              |             |                                                                            | 1.209     | 1.502       | 0.203 |
| A_32_P126214                      |             |                                                                                         | 1.764     | 1.915       | 0.393 | A_24_P374516                              | TMSB4X      | thymosin beta 4, X-linked                                                  | 1.204     | 1.457       | 0.132 |
| A_23_P312565                      |             |                                                                                         | 1.763     | 2.072       | 0.607 | A_23_P376239                              | PAPOLA      | poly(A) polymerase alpha                                                   | 1.197     | 1.683       | 0.626 |
| A_24_P649507                      |             |                                                                                         | 1.750     | 2.128       | 0.769 | A_23_P407203                              | ZEB2        | zinc finger E-box binding homeobox 2                                       | 1.194     | 1.493       | 0.195 |
| A_32_P81334                       | LARP4       | La ribonucleoprotein domain family, member 4                                            | 1.749     | 1.901       | 0.381 | A_24_P283294                              | MRPS10      | mitochondrial ribosomal protein S10                                        | 1.194     | 1.443       | 0.114 |
| A_24_P401842                      | HHIP        | hedgehog interacting protein                                                            | 1.742     | 1.722       | 0.152 | A_24_P144936                              | PKD1L2      | polycystic kidney disease 1-like 2                                         | 1.193     | 1.530       | 0.259 |
| A_32_P60561                       | RELN        | reelin                                                                                  | 1.657     | 1.766       | 0.254 | A_32_P378035                              |             |                                                                            | 1.179     | 1.478       | 0.195 |
| A_32_P145502                      | IGFBP3      | insulin-like growth factor binding protein 3                                            | 1.657     | 1.595       | 0.449 | A_24_P43959                               | FRMD4A      | FERM domain containing 4A                                                  | 1.175     | 1.520       | 0.280 |
| A_24_P333993                      | OR2W3       | olfactory receptor, family 2, subfamily W, member 3                                     | 1.646     | 1.620       | 0.082 | A_23_P211773                              | ACAP2       | ArfGAP with coiled-coil, ankyrin repeat and PH domains 2                   | 1.173     | 1.532       | 0.308 |
| A_23_P126613                      | AQP10       | aquaporin 10                                                                            | 1.599     | 1.617       | 0.105 | A_23_P214897                              | AKAP12      | A kinase (PRKA) anchor protein 12                                          | 1.171     | 1.762       | 0.775 |
| A_23_P332190                      | IRF8        | interferon regulatory factor 8                                                          | 1.596     | 1.654       | 0.156 | A_24_P79040                               | CAPN12      | calpain 12                                                                 | 1.170     | 1.583       | 0.453 |
| A_23_P55828                       | CCL25       | chemokine (C-C motif) ligand 25                                                         | 1.595     | 1.902       | 0.570 | A_23_P358857                              | ZNF644      | zinc finger protein 644                                                    | 1.164     | 1.529       | 0.303 |
| A_32_P3602                        | USP3        | ubiquitin specific peptidase 3                                                          | 1.585     | 1.569       | 0.052 | A_23_P115192                              | FCRL4       | Fc receptor-like 4                                                         | 1.162     | 1.566       | 0.348 |
| A_23_P33384                       | CITA        | class II, major histocompatibility complex, transactivator                              | 1.579     | 1.739       | 0.299 | A_32_P198978                              |             |                                                                            | 1.160     | 1.731       | 0.562 |
| A_23_P140490                      | BRUNOL6     | bruno-like 6, RNA binding protein (Drosophila)                                          | 1.577     | 1.623       | 0.128 | A_23_P630754                              | ADAMT52     | ADAM metalloproteinase with thrombospondin type 1 motif, 2                 | 1.157     | 1.619       | 0.471 |
| A_24_P388252                      | PPP3R1      | protein phosphatase 3 (formerly 2B), regulatory subunit B, alpha isoform                | 1.569     | 1.840       | 0.435 | A_24_P419323                              |             |                                                                            | 1.157     | 1.410       | 0.084 |
| A_24_P868334                      |             |                                                                                         | 1.549     | 1.599       | 0.112 | A_24_P579984                              |             |                                                                            | 1.150     | 1.509       | 0.284 |
| A_24_P221235                      |             |                                                                                         | 1.548     | 1.797       | 0.426 | A_24_P84719                               |             |                                                                            | 1.150     | 1.490       | 0.227 |
| A_23_P342869                      | FMN2        | omin 2                                                                                  | 1.547     | 1.751       | 0.346 | A_24_P128041                              | ATRX        | ATRX                                                                       | 1.149     | 1.445       | 0.155 |
| A_24_P263384                      |             |                                                                                         | 1.533     | 1.604       | 0.131 | A_23_P401606                              | EDIL3       | EGF-like repeats and discoidin I-like domains 3                            | 1.146     | 1.469       | 0.209 |
| A_24_P702871                      | ZNF518A     | zinc finger protein 518A                                                                | 1.529     | 1.906       | 0.849 | A_23_P81484                               |             |                                                                            | 1.145     | 1.419       | 0.107 |
| A_24_P511184                      |             |                                                                                         | 1.515     | 1.595       | 0.133 | A_24_P939967                              | FMRI        | fragile X mental retardation 1                                             | 1.144     | 1.443       | 0.160 |
| A_23_P321466                      | PEX11G      | peroxisomal biogenesis factor 11 gamma                                                  | 1.505     | 1.730       | 0.888 | A_24_P100650                              | C9orf11     | chromosome 9 open reading frame 11                                         | 1.143     | 1.458       | 0.192 |
| A_23_P5512                        |             |                                                                                         | 1.505     | 1.785       | 0.445 | A_32_P185361                              | DYRK1A      | dual-specificity tyrosine-(Y)-phosphorylation regulated kinase 1A          | 1.140     | 1.428       | 0.128 |
| A_32_P17672                       |             |                                                                                         | 1.480     | 1.583       | 0.605 | A_24_P867702                              |             |                                                                            | 1.136     | 1.679       | 0.595 |
| A_32_P34844                       |             |                                                                                         | 1.468     | 1.477       | 0.454 | A_24_P926450                              |             |                                                                            | 1.129     | 1.528       | 0.330 |
| A_32_P199292                      |             |                                                                                         | 1.462     | 1.589       | 0.156 | A_24_P162485                              | ANK1        | ankyrin 1, erythrocytic                                                    | 1.128     | 1.321       | 0.282 |
| A_23_P52749                       | ADAMT515    | ADAM metalloproteinase with thrombospondin type 1 motif, 15                             | 1.455     | 1.745       | 0.439 | A_24_P25252                               | ANKRD12     | ankyrin repeat domain 12                                                   | 1.128     | 1.515       | 0.293 |
| A_23_P348304                      | ADAMTSL1    | ADAMTS-like 1                                                                           | 1.455     | 1.917       | 0.599 | A_23_P64529                               |             |                                                                            | 1.123     | 1.474       | 0.243 |
| A_32_P117636                      | WWOX        | WW domain containing oxidoreductase                                                     | 1.446     | 1.721       | 0.363 | A_24_P392265                              | EXOC5       | exocyst complex component 5                                                | 1.121     | 1.477       | 0.238 |
| A_32_P63069                       |             |                                                                                         | 1.446     | 1.549       | 0.109 | A_32_P157228                              | AHCTF1      | AT hook containing transcription factor 1                                  | 1.121     | 1.526       | 0.342 |
| A_32_P115438                      |             |                                                                                         | 1.430     | 1.418       | 0.334 | <i>negatively regulated genes</i>         |             |                                                                            |           |             |       |
| A_24_P16606                       |             |                                                                                         | 1.404     | 1.788       | 0.536 | A_24_P852756                              | HLA-DQA2    | major histocompatibility complex, class II, DQ alpha 2                     | -1.940    | -2.190      | 0.640 |
| A_24_P135406                      | KCTD9       | potassium channel tetramerisation domain containing 9                                   | 1.403     | 1.462       | 0.009 | A_32_P195515                              | IQSEC3      | IQ motif and Sec7 domain 3                                                 | -1.917    | -1.840      | 0.180 |
| A_24_P851254                      |             |                                                                                         | 1.401     | 2.125       | 1.145 |                                           |             |                                                                            |           |             |       |

\*This table was compiled by generating the largest possible gene list with a &lt; 5% false discovery rate.
