# Supplementary material for: Down-regulation of sfrp1 in a mammary epithelial cell line promotes the development of a cd44high/cd24low population which is invasive and resistant to anoikis
Source: Cancer Cell Int. 2009 May 7;9:11. doi: 10.1186/1475-2867-9-11 (PMC2687411; doi:10.1186/1475-2867-9-11)
Supplement: Additional File 2 — Primers used for real-time PCR analysis. A list of the forward and reverse primers utilized in the real-time PCR assays described in the manuscript. [file 1475-2867-9-11-S2.pdf]

**Table 2.** Primers utilized for real-time PCR analysis

| <b>Amplicon</b> | <b>Forward Primer</b>           | <b>Reverse Primer</b>           |
|-----------------|---------------------------------|---------------------------------|
| SFRP1           | 5'-GCCCCGAGATGCTTAAGTGTGACAA-3' | 5'- ACTCGCTGGCACAGAGATGTTCAA-3' |
| Cyclin D1       | 5'-AACTACCTGGACCGCTTCCT -3'     | 5'- CCACTTGAGCTTGTTACCA-3'      |
| E-cadherin      | 5'-ACACCATCCTCAGCCAAGA-3'       | 5'-CGTAGGGAAACTCTCTCGGT-3'      |
| vimentin        | 5'-AAAGTGTGGCTGCCAAGAAC-3'      | 5'-AGCCTCAGAGAGGTCAGCAA-3'      |
| Snail           | 5'-GCTGCAGGACTCTAATCCAGA-3'     | 5'-ATCTCCGGAGGTGGGATC-3'        |
| Slug            | 5'-CATGCCTGTCATACCACAAC-3'      | 5'-GGTGTCTAGATGGAGGAGGG-3'      |
| ZEB1            | 5'- GGGAGGAGCAGTGAAAGAGA-3'     | 5'-TTTCTTGCCCTTCCTTTCTG-3'      |
| ZEB2            | 5'- AAGCCAGGGACAGATCAGC-3'      | 5'-CCACACTCTGTGCATTTGAACT-3'    |
| GAPDH           | 5'-GAAGATGGTGATGGGATTTC-3'      | 5'-GAAGGTGAAGGTCGGAGT -3'       |
